# Supplementary material for: Disruption of hypoxia-inducible fatty acid binding protein 7 induces beige fat-like differentiation and thermogenesis in breast cancer cells
Source: Cancer Metab. 2020 Jul 6;8:13. doi: 10.1186/s40170-020-00219-4 (PMC7336487; doi:10.1186/s40170-020-00219-4)
Supplement: Supplementary file 8 — Additional file 8: Table S1. Prognostic impact of hypoxia ssGSEA, UCP1 and FABP7 [file 40170_2020_219_MOESM8_ESM.xlsx]

## Sheet: ssGSEA
	Table S1. Prognostic impact of hypoxia ssGSEA, UCP1 and FABP7
					Univariate			Multivariate
					HR	p-value		HR	p-value
	METABRIC
		All cases (N=1904)
			hypoxia-ssGSEA		1.60 (1.00-2.30)	0.03*		28.0(6.00-130.90)	<0.001***
			UCP1		0.94 (0.84-1.10)	0.27		1.50 (1.20-1.90)	0.001**
			FABP7		0.99 (0.94-1.00)	0.504		1.40 (1.20-1.60)	<0.001***
		ER+ (N=1445)
			hypoxia-ssGSEA		1.60 (0.86-3.00)	0.113		45.4 (6.30-327.00)	<0.001***
			UCP1		0.99 (0.88-1.10)	0.908		1.70 (1.20-2.20)	<0.001***
			FABP7		0.97 (0.89-1.10)	0.558		1.50 (1.20-1.80)	<0.001***
		ER- (N=429)
			hypoxia-ssGSEA		1.90 (1.00-3.60)	0.035*		11.23 (0.74-169.60)	0.081
			UCP1		0.62 (0.28-1.40)	0.241		0.88 (0.36-2.20)	0.784
			FABP7		0.95 (0.90-1.00)	0.114		1.20 (0.92-1.60)	0.186
	TCGA
		All cases (N=960)
			hypoxia-ssGSEA		2.00 (0.73-5.30)	0.182		0.37 (0.082-1.67)	0.195
			UCP1		1.00 (0.92-1.10)	0.763		0.98 (0.88-1.08)	0.637
			FABP7		0.92 (0.87-0.97)	0.003**		0.89 (0.82-0.96)	0.003**
		ER+ (N=708)
			hypoxia-ssGSEA		2.10 (0.33-14.00)	0.434		0.22 (0.013-3.48)	0.28
			UCP1		1.00 (0.94-1.20)	0.403		0.99 (0.86-1.15)	0.91
			FABP7		0.80 (0.71-0.89)	<0.001***		0.78 (0.69-0.87)	<0.001***
		ER- (N=208)
			hypoxia-ssGSEA		3.10 (0.83-12.0)	0.093		2.32 (0.23-22.90)	0.472
			UCP1		1.00 (0.58-1.80)	0.944		1.02 (0.58-1.80)	0.951
			FABP7		0.93 (0.86-1.00)	0.092		0.98 (0.84-1.10)	0.762
